# Supplementary material
Source: Springer Nature journal article supplement (https://www.springermedizin.de/resource/supplementary/13054_2011_9607_MOESM1_ESM.pdf/9706608)

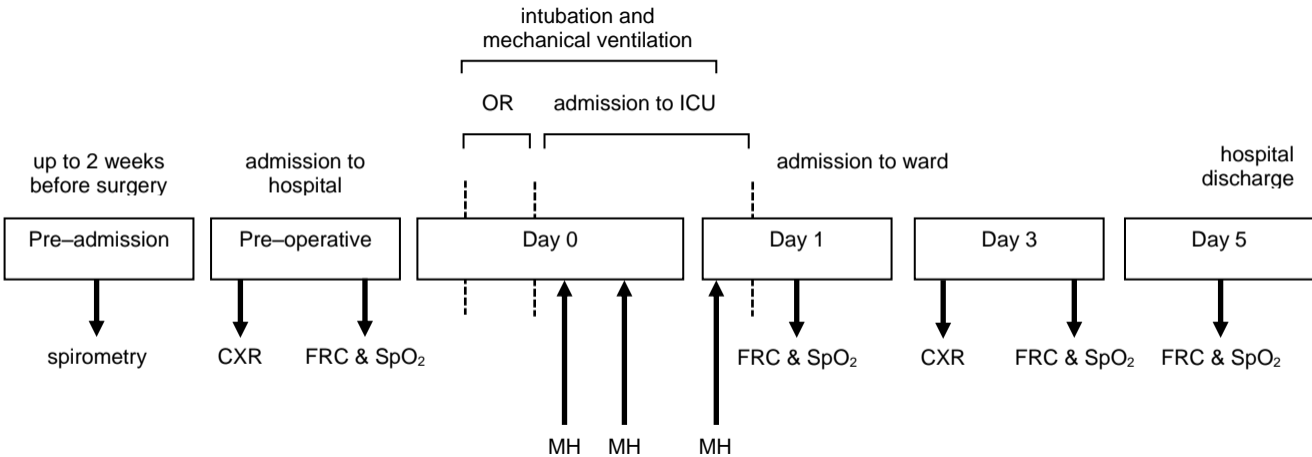

Supplement: MOESM1 [file 9706608]
